# Supplementary material for: Identifying cow – level factors and farm characteristics associated with locomotion scores in dairy cows using cumulative link mixed models
Source: PubMed Central journal article supplement (PMC8797239; doi:10.1371/journal.pone.0263294), 2022-01-28
Supplement: pone.0263294.s005.pdf [file pone.0263294.s005.pdf]

|                                                                                                        |             |         |                      |                       |                        |                |                         |
|--------------------------------------------------------------------------------------------------------|-------------|---------|----------------------|-----------------------|------------------------|----------------|-------------------------|
| Date                                                                                                   | Farm ID     |         |                      |                       |                        |                |                         |
| Interviewer                                                                                            |             |         |                      |                       |                        |                |                         |
| Interviewee                                                                                            |             |         |                      |                       |                        |                |                         |
|                                                                                                        |             |         |                      |                       |                        |                |                         |
| A. Pasture                                                                                             |             |         |                      |                       |                        |                |                         |
| <b>A1. Is pasture access provided? If yes, which group of animals is pastured during which season?</b> |             |         |                      |                       |                        |                |                         |
|                                                                                                        | young stock | heifers | early lactating cows | cows in mid-lactation | cows in late lactation | early dry cows | cows in late dry period |
| no                                                                                                     |             |         |                      |                       |                        |                |                         |
| summer                                                                                                 |             |         |                      |                       |                        |                |                         |
| year round                                                                                             |             |         |                      |                       |                        |                |                         |
|                                                                                                        |             |         |                      |                       |                        |                |                         |
| <b>A2. Is exercise area provided? If yes, which group of animals during which season?</b>              |             |         |                      |                       |                        |                |                         |
|                                                                                                        | young stock | heifers | early lactating cows | cows in mid-lactation | cows in late lactation | early dry cows | cows in late dry period |
| no                                                                                                     |             |         |                      |                       |                        |                |                         |
| summer                                                                                                 |             |         |                      |                       |                        |                |                         |
| year round                                                                                             |             |         |                      |                       |                        |                |                         |
