# Supplementary material for: Identifying cow – level factors and farm characteristics associated with locomotion scores in dairy cows using cumulative link mixed models
Source: PLoS One. 2022 Jan 28;17(1):e0263294. doi: 10.1371/journal.pone.0263294 (PMC8797239; doi:10.1371/journal.pone.0263294)
Supplement: S4 File — (PDF) [file pone.0263294.s006.pdf]

## A. Weide-Haltung

**A1. Kommen Ihre Tiere auf die Weide? Wenn ja, welche Gruppen zu welcher Jahreszeit?**

[illegible]

**A2. Haben Ihre Tiere einen Auslauf zur Verfügung? Wenn ja, welche Gruppen zu welcher Jahreszeit?**

[illegible]
